# Supplementary material for: An integrative approach sheds new light onto the systematics and ecology of the widespread ciliate genus Coleps (Ciliophora, Prostomatea)
Source: PubMed Central journal article supplement (PMC7960993; doi:10.1038/s41598-021-84265-y), 2021-03-15
Supplement: 41598_2021_84265_MOESM1_ESM.pdf [file 41598_2021_84265_MOESM1_ESM.pdf]

**Supplemental Material to:**

**An integrative approach sheds new light onto the systematics and ecology of the widespread ciliate genus *Coleps* (Ciliophora, Prostomatea)**

**Thomas Pröschold<sup>1</sup>, Daniel Rieser<sup>1</sup>, Tatyana Darienko<sup>2</sup>, Laura Nachbaur<sup>1</sup>, Barbara Kammerlander<sup>1</sup>, Kuimei Qian<sup>1,3</sup>, Gianna Pitsch<sup>4</sup>, Estelle Patricia Bruni<sup>4,5</sup>, Zhishuai Qu<sup>6</sup>, Dominik Forster<sup>6</sup>, Cecilia Rad-Menendez<sup>7</sup>, Thomas Posch<sup>4</sup>, Thorsten Stoeck<sup>6</sup> & Bettina Sonntag<sup>1</sup>**

<sup>1</sup> Research Department for Limnology, Mondsee, University of Innsbruck, Mondsee, Austria

<sup>2</sup> Experimental Phycology and Culture Collection of Algae, University of Göttingen, Germany

<sup>3</sup> College of Environmental Engineering, Xuzhou Institute of Technology, Xuzhou, People's Republic of China

<sup>4</sup> Limnological Station, Department of Plant and Microbial Biology, University of Zürich, Kilchberg, Switzerland

<sup>5</sup> Laboratory of Soil Biodiversity, University of Neuchâtel, Neuchâtel, Switzerland

<sup>6</sup> Department of Ecology, Technical University of Kaiserslautern, Kaiserslautern, Germany

<sup>7</sup> Culture Collection of Algae and Protozoa, Scottish Association for Marine Science, Oban, Scotland

**Figure S1:** SSU secondary structure of *Coleps viridis*, strain CCAP 1613/7 (MT253680). The V4 and V9 regions of the SSU are highlighted.

SSU rRNA secondary structure model  
of *Coleps viridis*  
(CCAP 1613/7)  
Accession number: MT253680

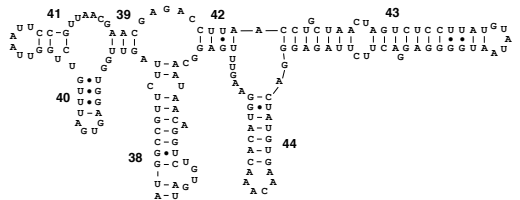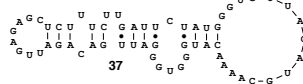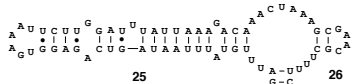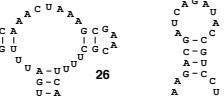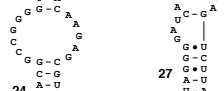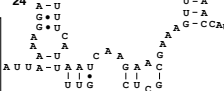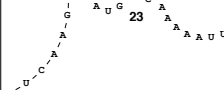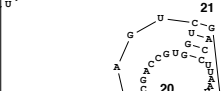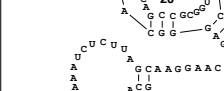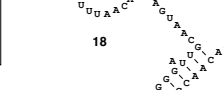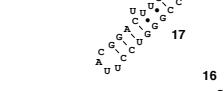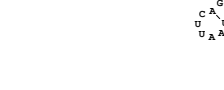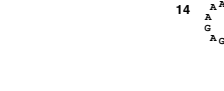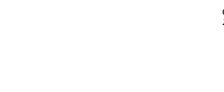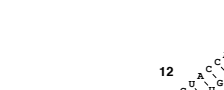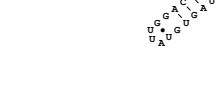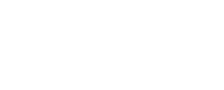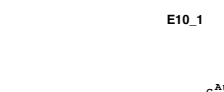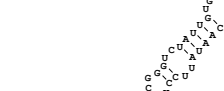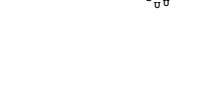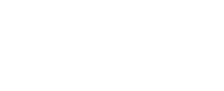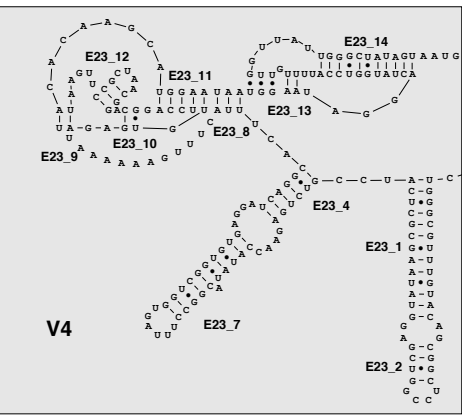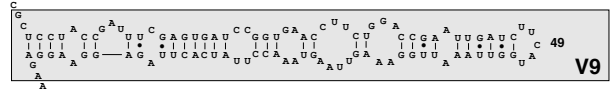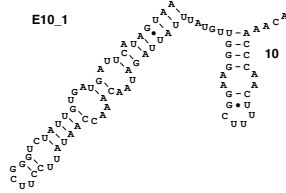

**Figure S2:** Comparison between abundance of *Coleps viridis* and the number of reads of this species and its endosymbiotic green algae *Micractinium conductrix* in Lake Mondsee (LM) and Lake Zurich (LZ).

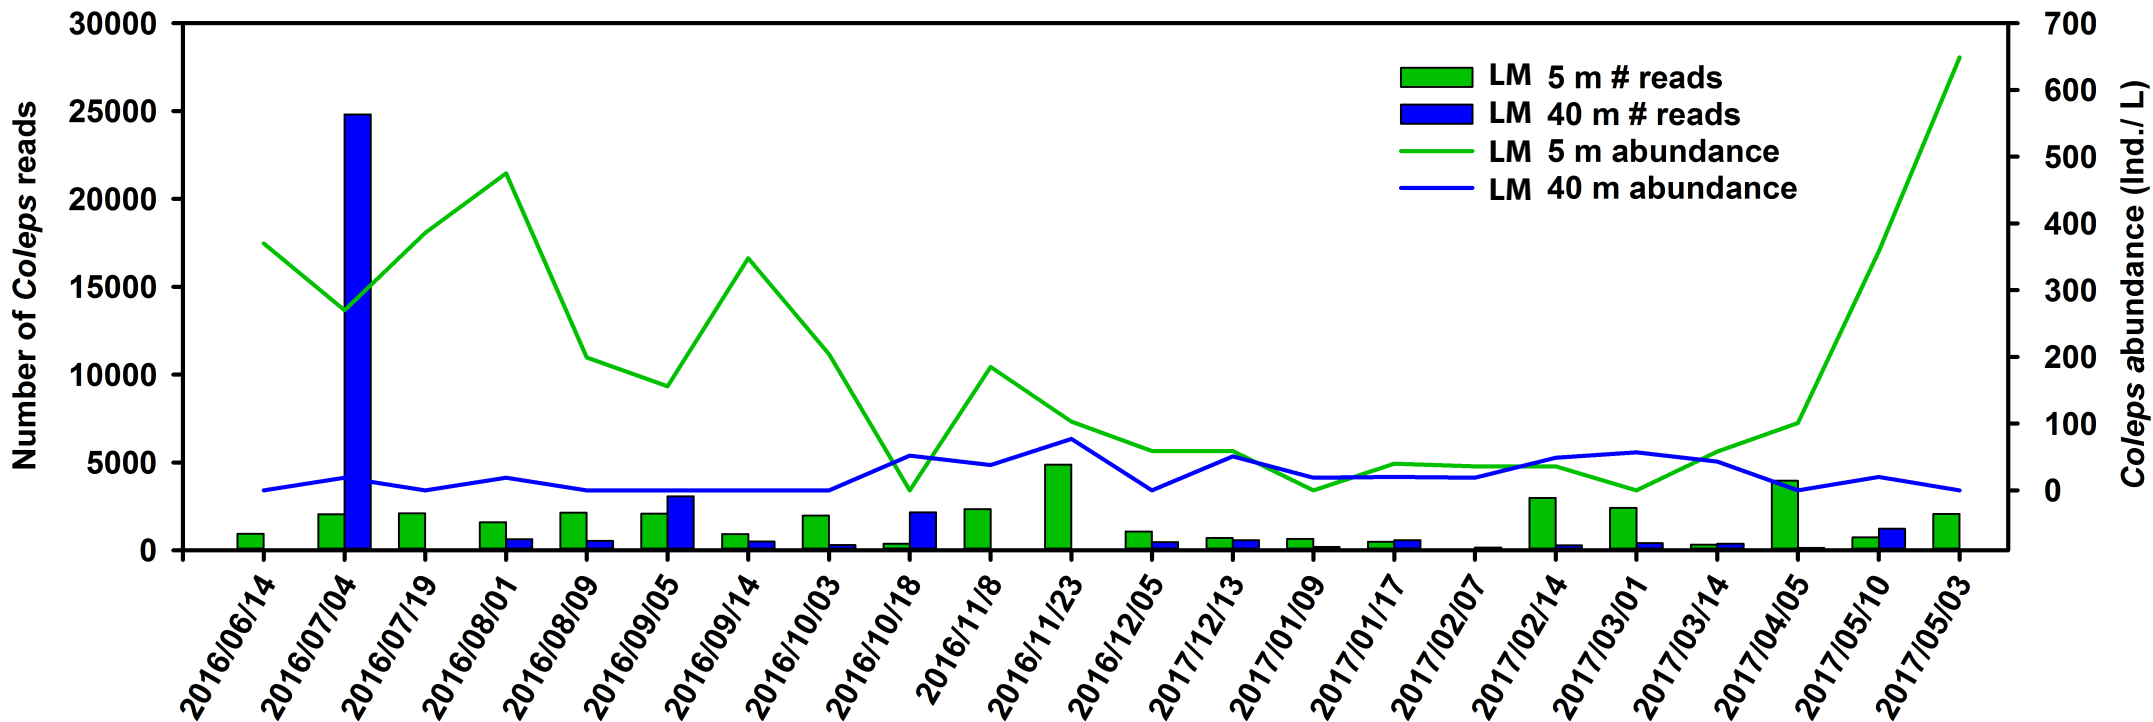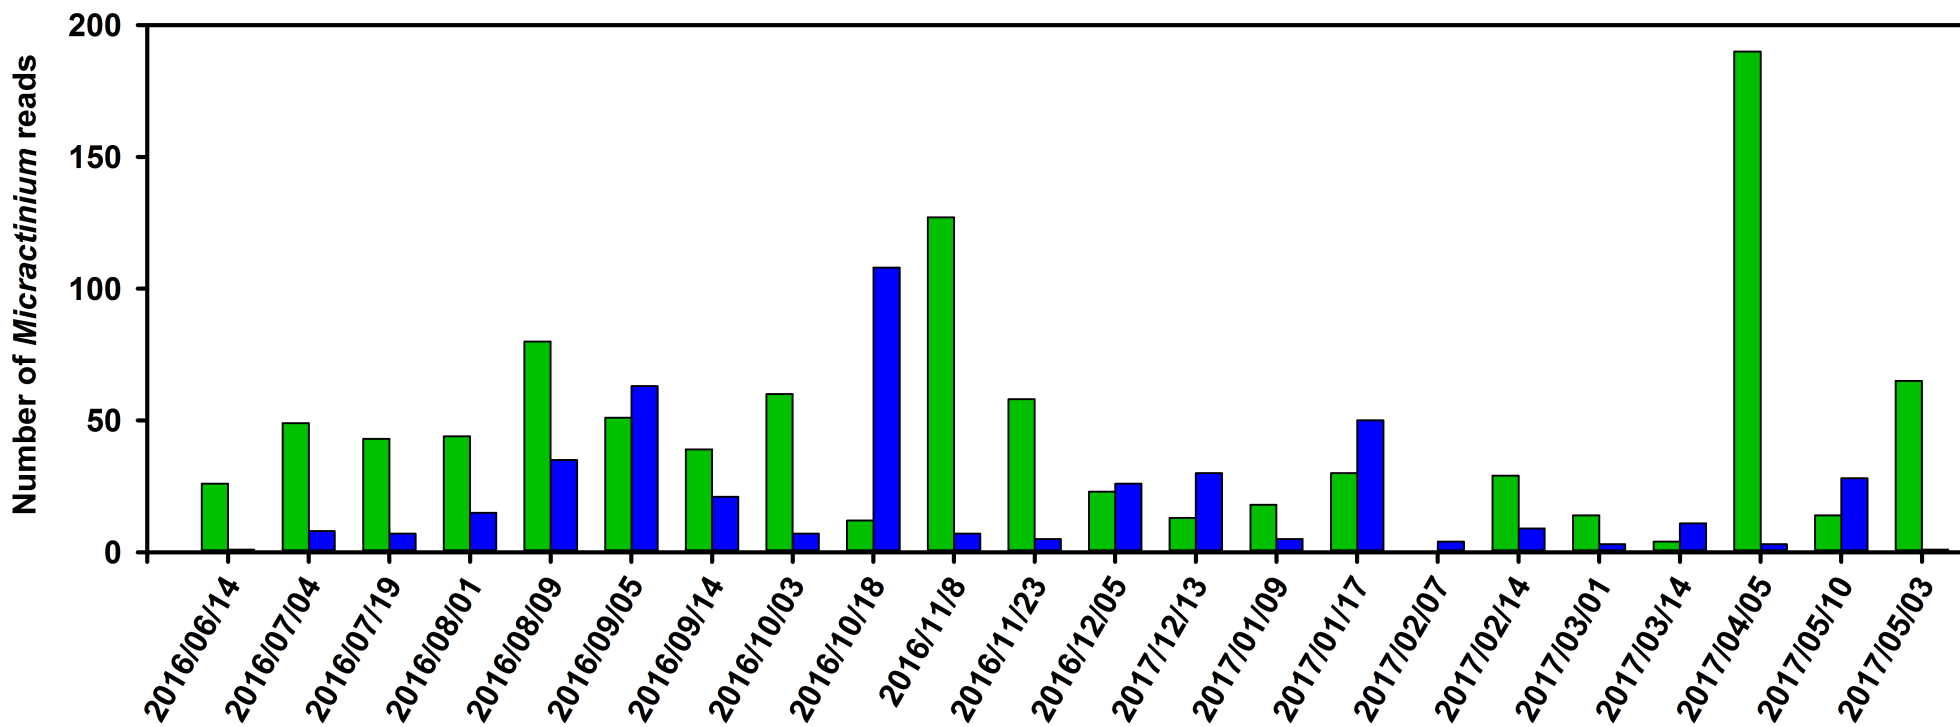

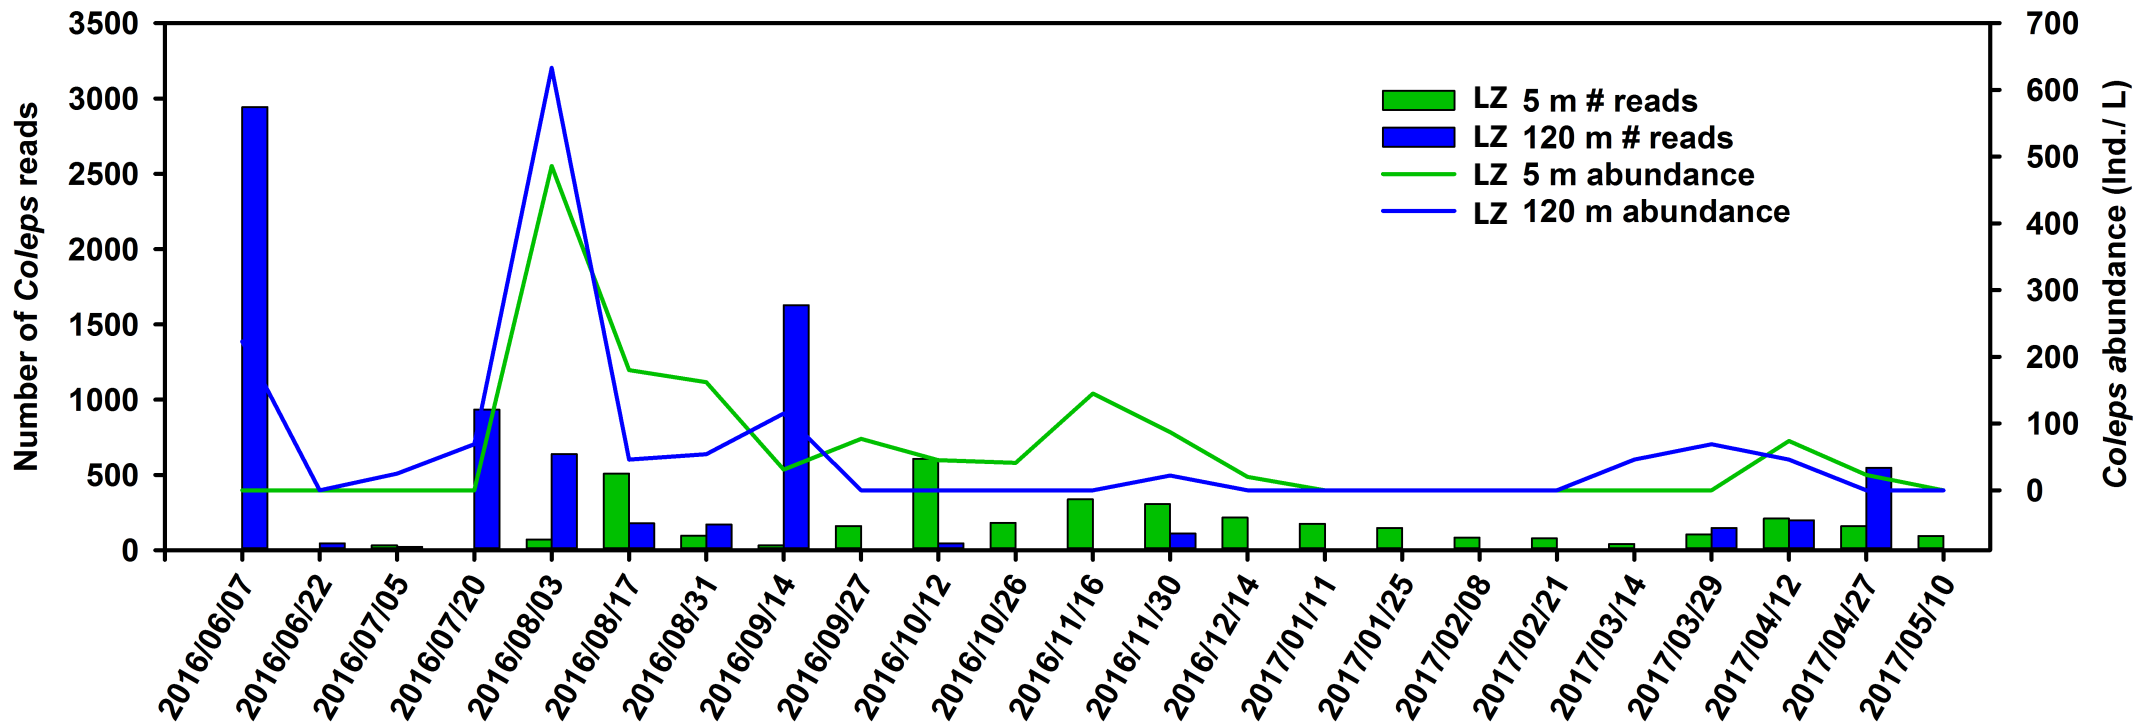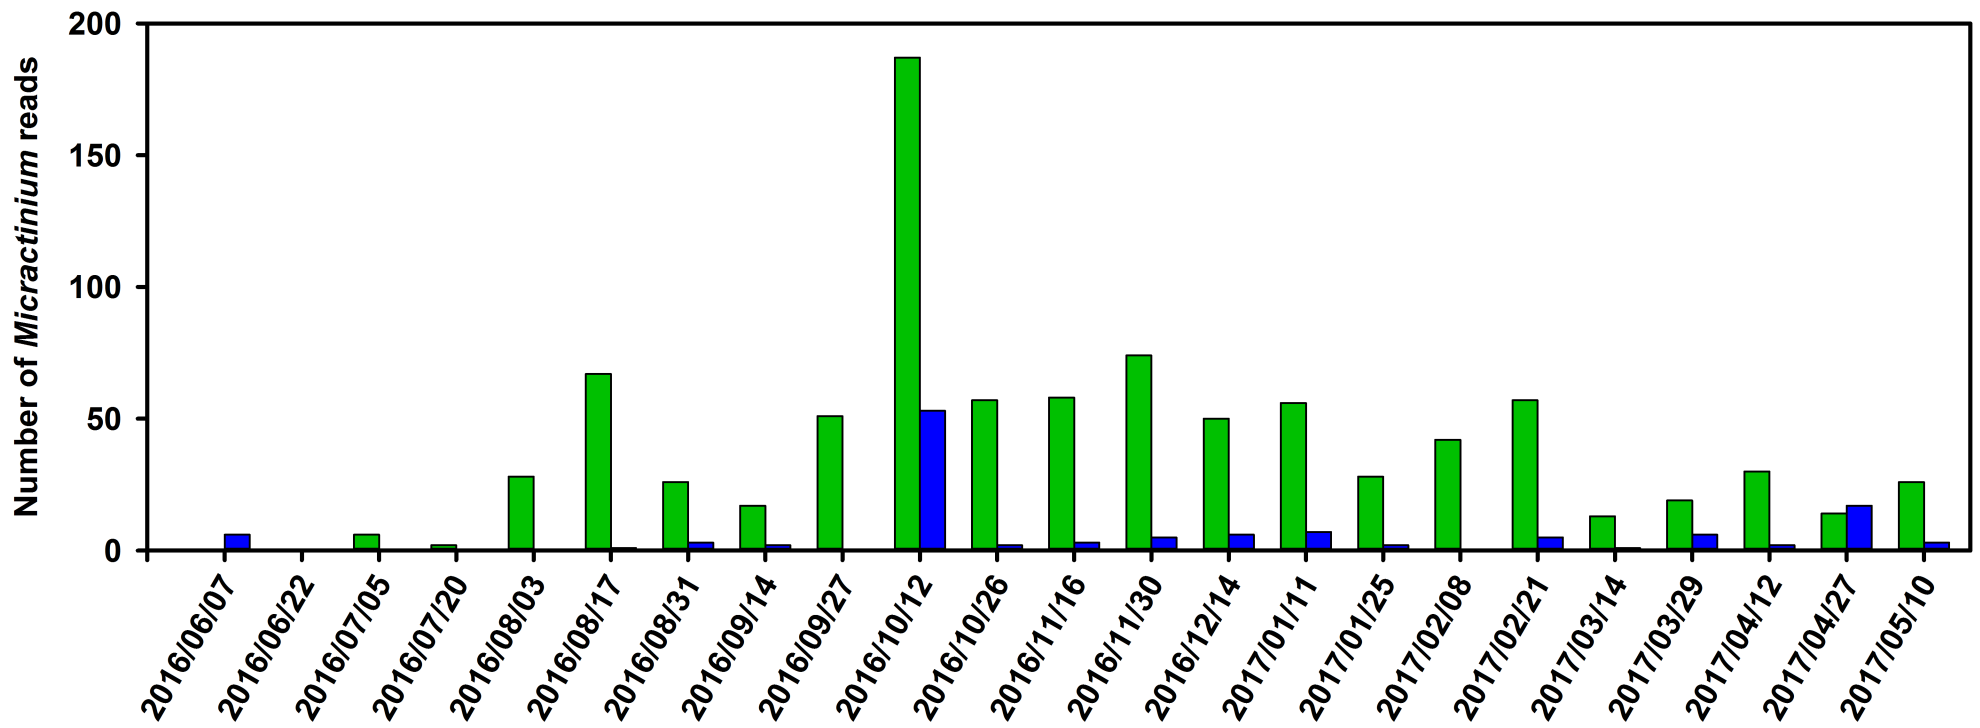

**Table S1:** Overview over described genera belonging to the Colepidae (Prostomatea). For *Coleps* and *Tiarina* symbiotic associations with photosynthetic protists are known. All other genera contain heterotrophic congeners.

| Colepid genera                                      | Colepidae with                                    | plate type      | species # | reference                                                                |
|-----------------------------------------------------|---------------------------------------------------|-----------------|-----------|--------------------------------------------------------------------------|
| <b>Coleps</b> Nitzsch 1827                          | spiny armour composed of 6 tiers                  | <b>hirtus</b>   | 5         | Foissner et al. (2008), Lu et al. (2016)                                 |
| <b>Kotinia</b> Obolkina in Aescht 2001              | spiny armour composed of 8 tiers                  | unspecified     | 3         | Aescht (2001)                                                            |
| <b>Levicoleps</b> Foissner, Kusuoka & Shimano 2008  | smooth armour composed of 6 tiers                 | <b>hirtus</b>   | 2         | Foissner et al. (2008), Chen et al. (2016)                               |
| <b>Macrocoleps</b> Obolkina 1995                    | spiny armour composed of about 12 irregular tiers | unspecified     | 2         | Obolkina (1995)                                                          |
| <b>Nolandia</b> Small & Lynn 1985                   | spiny armour composed of 6 tiers                  | <b>nolandii</b> | 2         | Small & Lynn (1985), Chen et al. (2010), Chen et al. (2012)              |
| <b>Pinacocoleps</b> Diesing 1865                    | spiny armour composed of 6 tiers                  | <b>incurvus</b> | 7         | Diesing (1865), Chen et al. (2010), Lu et al. (2013), Moon et al. (2017) |
| <b>Planicoleps</b> Dragesco & Dragesco-Kernéis 1991 | smooth armour composed of 8 tiers                 | unspecified     | 1         | Dragesco & Dragesco-Kernéis (1991)                                       |
| <b>Reticoleps</b> Foissner, Kusuoka & Shimano 2008  | spiny armour composed of 6 tiers                  | <b>remanei</b>  | 1         | Foissner et al. (2008)                                                   |
| <b>Tiarina</b> Bergh 1881                           | spiny/smooth armour composed of 6 tiers           | <b>tiarina</b>  | 1         | Bergh (1881), Chen et al. (2012)                                         |
| <b>Apocoleps</b> Chen, Warren & Song 2009           | spiny armour composed of 8 tiers                  | <b>nolandii</b> | 2         | Chen et al. (2009), Chen et al. (2012)                                   |

#### References:

- Aescht, E. Catalogue of the generic names of ciliates (Protozoa, Ciliophora). *Denisia* **1**, 1-350 (2001).
- Bergh, R. S. Bidrag til Cilioflagellaternes Naturhistorie. *Videnskabel. Meddel. fr. D. Naturhist. Forening Kjøbenhavn* **3**, 60–76 (1881).
- Chen, X., Warren, A. & Song, W. Taxonomic studies on a new marine ciliate, *Apocoleps magnus* gen. nov., spec. nov. (Ciliophora, Colepidae), isolated from Qingdao, China. *J. Ocean Univ. China* **8**, 317-321 (2009).
- Chen, X., Wang, Y., Long, H., Al-Rasheid, K. A. S., Warren, A. & Song, W. Morphological studies on two marine colepid ciliates from Qingdao, China, *Nolandia orientalis* spec. nov. and *Pinacocoleps similis* (Kahl, 1933) comb. nov. (Ciliophora, Colepidae). *Eur. J. Protistol.* **46**, 254-262 (2010).
- Chen, X., Gao, S., Liu, W., Song, W., Al-Rasheid, K. A. S. & Warren, A. Taxonomic descriptions of three marine colepid ciliates, *Nolandia sinica* spec. nov., *Apocoleps caoi* spec. nov. and *Tiarina fusa* (Claparede & Lachmann, 1858) Bergh, 1881 (Ciliophora, Prorodontida). *Internat. J. Syst. Evol. Microbiol.* **62**, 735-744 (2012).
- Chen, X., Sharib, S. U. A., Kim, J. H., Jang, S. W. & Shin, M. K. Morphological description and molecular phylogeny of two species of *Levicoleps* (Ciliophora, Prostomatida), *L. taehwae* nov. spec. and *L. biwae jejuensis* nov. subspec., collected in Korea. *J. Eukaryot. Microbiol.* **63**, 471-480 (2016).
- Diesing, K. M. Revision der Prothelminthen. Abtheilung: Amastigen. I. Amastigen ohne Peristom. *Sber. Akad. Wiss. Wien* **52**, 505-579 (1865).
- Dragesco, J. & Dragesco-Kernéis, A. Free-living ciliates from the coastal area of Lake Tanganyika (Africa). *Eur. J. Protistol.* **26**, 216-235 (1991).
- Foissner, W., Kusuoka, Y. & Shimano, S. Morphology and gene sequence of *Levicoleps biwae* n. gen., n. sp. (Ciliophora, Prostomatida), a proposed endemic from the ancient Lake Biwa, Japan. *J. Eukaryot. Microbiol.* **55**, 185-200 (2008).
- Lu, B., Huang, J. & Chen, X. The morphology and SSU rRNA gene sequence analysis of a poorly-known brackish water ciliate, *Pinacocoleps tessellatus* (Kahl, 1930) (Ciliophora, Colepidae) from Hangzhou Bay, China. *Zootaxa* **3637**, 123-130 (2013).
- Lu, B.-R., Ma, M.-Z., Gao, F., Shi, Y.-H. & Chen, X.-R. Morphology and molecular phylogeny of two colepid species from China, *Coleps amphacanthus* Ehrenberg, 1833 and *Levicoleps biwae jejuensis*. *Zool. Res.* **37**, 176-185 (2016).
- Moon, J. H., Kim, J. H. & Jung, J.-H. Taxonomical reinvestigation of the colepid species *Pinacocoleps pulcher* (Spiegel, 1926) Foissner et al., 2008 (Ciliophora: Prorodontida: Colepidae). *Acta Protozool.* **56**, 161-169 (2017).
- Obolkina, L. A. New species of the family Colepidae (Prostomatida, Ciliophora) from Lake Baikal. *Zool. Zh.* **74**, 3-19 (1995).
- Small, E. B. & Lynn, D. H. Phylum Ciliophora Doflein, 1901. In: Lee, J. J., Hutner, S. H. & Bovee, E. C. (eds), *An illustrated guide to the protozoa*. Society of Protozoologists, Lawrence, KS, pp. 393-575 (1985).



**Table S2:** Origin and morphometric characteristics and accession numbers of the investigated *Coleps* strains. All measurements in  $\mu\text{m}$ . (Mean = arithmetic mean; SD = standard deviation; SE = standard error; CV = coefficient of variation in %; Min. = minimum; Max. = maximum; n = number of specimens analyzed).

| Species                 | Strain number | Origin                                                                    | Country     | Morphology studied | Accession # |
|-------------------------|---------------|---------------------------------------------------------------------------|-------------|--------------------|-------------|
| <i>Coleps viridis</i>   | CIL-2017/5    | Lake Mondsee, Upper Austria, 0-20m                                        | Austria     | yes                | -           |
|                         | CIL-2017/6    | Lake Mondsee, Upper Austria, 30-63m                                       | Austria     | yes                | MT253675    |
|                         | CIL-2017/7    | Lake Mondsee, Upper Austria, 30-63m                                       | Austria     | yes                | -           |
|                         | CIL-2017/8    | Lake Mondsee, Upper Austria, 0-20m                                        | Austria     | yes                | MT253676    |
|                         | CIL-2017/9    | Lake Mondsee, Upper Austria, 30-63m                                       | Austria     | yes                | MT253677    |
|                         | CIL-2017/10   | Lake Mondsee, Upper Austria, 0-20m                                        | Austria     | yes                | MT253678    |
|                         | CIL-2017/13   | Lake Mondsee, Upper Austria, 0-20m                                        | Austria     | yes                | MT253681    |
|                         | CCAP 1613/1   | Garden pool, Shelford, Cambridge                                          | England     | no                 | MT253670    |
|                         | CCAP 1613/2   | Brick pits, Madingley, Cambridge                                          | England     | no                 | MT253671    |
|                         | CCAP 1613/3   | Manchester                                                                | England     | yes                | MT253672    |
|                         | CCAP 1613/4   | Gattiker pond, Canton Zurich                                              | Switzerland | yes                | MT253673    |
|                         | CCAP 1613/5   | Lohbach, Tyrol                                                            | Austria     | yes                | MT253674    |
|                         | CCAP 1613/6   | Lake Mondsee, Upper Austria, 30-63m                                       | Austria     | yes                | MT253679    |
|                         | CCAP 1613/7   | Lake Mondsee, Upper Austria, 0-20m                                        | Austria     | yes                | MT253680    |
|                         | CCAP 1613/8   | Lake Zurich, Canton Zurich                                                | Switzerland | yes                | MT253682    |
|                         | CCAP 1613/9   | Lake Mondsee, Upper Austria, 30-63m                                       | Austria     | yes                | MT253683    |
|                         | CCAP 1613/10  | Trough at the station of National Park Heiliges Meer, Nordrhein-Westfalen | Germany     | yes                | MT253684    |
|                         | CCAP 1613/11  | Lake Mondsee, Upper Austria, 30-63m                                       | Austria     | yes                | MT253685    |
|                         | CCAP 1613/12  | Lake Mondsee, Upper Austria, 30-63m                                       | Austria     | yes                | -           |
| <i>Coleps hirtus</i>    | CCAP 1613/14  | Lake Piburg, Tyrol                                                        | Austria     | yes                | MT253687    |
| <i>Nolandia nolandi</i> | CCAP 1613/15  | Lake Wirpitsch, Salzburg                                                  | Austria     | yes                | MT253688    |

| Character    | Species                  | Strain number | Mean  | Median | SD   | SE    | CV    | Min.  | Max.  | n  |
|--------------|--------------------------|---------------|-------|--------|------|-------|-------|-------|-------|----|
| Cell length  | <i>Coleps viridis</i>    | CIL-2017/5    | 63.29 | 63.42  | 1.01 | 0.22  | 1.59  | 61.35 | 64.9  | 21 |
|              |                          | CIL-2017/6    | 56.13 | 56.32  | 0.90 | 0.19  | 1.60  | 54.48 | 57.4  | 21 |
|              |                          | CIL-2017/7    | 56.46 | 56.38  | 0.88 | 0.19  | 1.56  | 55.07 | 58.61 | 21 |
|              |                          | CIL-2017/8    | 63.37 | 63.34  | 0.50 | 0.11  | 0.80  | 62.44 | 64.5  | 21 |
|              |                          | CIL-2017/9    | 48.02 | 48.2   | 0.61 | 0.13  | 1.27  | 46.64 | 48.98 | 21 |
|              |                          | CIL-2017/10   | 57.90 | 57.89  | 0.46 | 0.10  | 0.81  | 57.17 | 58.75 | 21 |
|              |                          | CIL-2017/13   | 56.63 | 56.61  | 0.41 | 0.09  | 0.73  | 56.1  | 57.6  | 21 |
|              |                          | CCAP 1613/3   | 51.70 | 51.26  | 1.49 | 0.32  | 2.88  | 49.37 | 55.39 | 21 |
|              |                          | CCAP 1613/4   | 51.14 | 51.04  | 0.96 | 0.21  | 1.89  | 49.02 | 52.7  | 21 |
|              |                          | CCAP 1613/5   | 51.34 | 51.61  | 0.98 | 0.21  | 1.91  | 48.8  | 52.65 | 21 |
|              |                          | CCAP 1613/6   | 45.03 | 45.11  | 0.64 | 0.14  | 1.42  | 44.01 | 45.96 | 21 |
|              |                          | CCAP 1613/7   | 52.81 | 52.71  | 0.53 | 0.11  | 1.02  | 51.95 | 53.82 | 21 |
|              |                          | CCAP 1613/8   | 55.01 | 55.26  | 0.75 | 0.16  | 1.36  | 53.16 | 56.12 | 21 |
|              |                          | CCAP 1613/9   | 47.43 | 47.42  | 0.58 | 0.12  | 1.23  | 46.15 | 48.48 | 21 |
|              |                          | CCAP 1613/10  | 44.99 | 44.95  | 0.52 | 0.11  | 1.17  | 44.21 | 45.9  | 21 |
|              |                          | CCAP 1613/11  | 56.70 | 56.53  | 0.45 | 0.09  | 0.79  | 56.07 | 57.7  | 21 |
| CCAP 1613/12 | 47.58                    | 47.62         | 0.51  | 0.11   | 1.08 | 46.18 | 48.75 | 21    |       |    |
|              | <i>Coleps hirtus</i>     | CCAP 1613/14  | 47.31 | 47.07  | 2.59 | 0.56  | 5.48  | 42.28 | 51.91 | 21 |
|              | <i>Nolandia nolandii</i> | CCAP 1613/15  | 43.57 | 43.6   | 0.63 | 0.13  | 1.46  | 42.12 | 44.83 | 21 |

| Character    | Species                 | Strain number | Mean  | Median | SD   | SE    | CV    | Min.  | Max.  | n  |
|--------------|-------------------------|---------------|-------|--------|------|-------|-------|-------|-------|----|
| Cell width   | <i>Coleps viridis</i>   | CIL-2017/5    | 34.76 | 34.07  | 2.22 | 0.48  | 6.41  | 31.76 | 40.52 | 21 |
|              |                         | CIL-2017/6    | 31.37 | 31.67  | 1.27 | 0.27  | 4.04  | 28.26 | 33.26 | 21 |
|              |                         | CIL-2017/7    | 34.56 | 34.39  | 0.70 | 0.15  | 2.04  | 33.52 | 35.77 | 21 |
|              |                         | CIL-2017/8    | 33.65 | 33.62  | 0.40 | 0.08  | 1.19  | 33.12 | 34.65 | 21 |
|              |                         | CIL-2017/9    | 27.75 | 27.65  | 0.50 | 0.11  | 1.82  | 27.07 | 28.91 | 21 |
|              |                         | CIL-2017/10   | 27.43 | 27.51  | 0.33 | 0.07  | 1.21  | 26.88 | 27.96 | 21 |
|              |                         | CIL-2017/13   | 29.88 | 29.87  | 0.45 | 0.09  | 1.52  | 29.11 | 30.94 | 21 |
|              |                         | CCAP 1613/3   | 24.54 | 24.8   | 2.06 | 0.45  | 8.42  | 20.61 | 29.55 | 21 |
|              |                         | CCAP 1613/4   | 31.79 | 31.4   | 1.69 | 0.37  | 5.34  | 29.16 | 35.07 | 21 |
|              |                         | CCAP 1613/5   | 24.77 | 24.73  | 0.87 | 0.19  | 3.55  | 23.45 | 26.8  | 21 |
|              |                         | CCAP 1613/6   | 21.49 | 21.47  | 0.33 | 0.07  | 1.56  | 21.03 | 22.29 | 21 |
|              |                         | CCAP 1613/7   | 35.33 | 35.3   | 0.20 | 0.04  | 0.58  | 34.92 | 35.71 | 21 |
|              |                         | CCAP 1613/8   | 33.44 | 33.56  | 0.87 | 0.19  | 2.60  | 32.07 | 34.82 | 21 |
|              |                         | CCAP 1613/9   | 25.51 | 25.49  | 0.29 | 0.06  | 1.14  | 25.1  | 26.17 | 21 |
|              |                         | CCAP 1613/10  | 24.61 | 24.46  | 0.40 | 0.08  | 1.63  | 24.15 | 25.57 | 21 |
|              |                         | CCAP 1613/11  | 30.31 | 30.4   | 0.43 | 0.09  | 1.43  | 29.18 | 30.9  | 21 |
| CCAP 1613/12 | 26.49                   | 26.47         | 0.54  | 0.11   | 2.05 | 25.06 | 27.66 | 21    |       |    |
|              | <i>Coleps hirtus</i>    | CCAP 1613/14  | 24.53 | 24.21  | 1.35 | 0.29  | 5.53  | 22.64 | 27.69 | 21 |
|              | <i>Nolandia nolandi</i> | CCAP 1613/15  | 21.69 | 22.26  | 1.21 | 0.26  | 5.58  | 19.53 | 23.38 | 21 |

| Character          | Species                 | Strain number | Mean | Median | SD   | SE   | CV    | Min. | Max. | n  |
|--------------------|-------------------------|---------------|------|--------|------|------|-------|------|------|----|
| Length:width ratio | <i>Coleps viridis</i>   | CIL-2017/5    | 1.82 | 1.85   | 0.10 | 0.02 | 5.73  | 1.58 | 1.93 | 21 |
|                    |                         | CIL-2017/6    | 1.79 | 1.76   | 0.08 | 0.01 | 4.81  | 1.68 | 2.02 | 21 |
|                    |                         | CIL-2017/7    | 1.63 | 1.64   | 0.03 | 0    | 2.12  | 1.54 | 1.68 | 21 |
|                    |                         | CIL-2017/8    | 1.88 | 1.88   | 0.02 | 0    | 1.42  | 1.81 | 1.91 | 21 |
|                    |                         | CIL-2017/9    | 1.73 | 1.72   | 0.04 | 0    | 2.40  | 1.64 | 1.78 | 21 |
|                    |                         | CIL-2017/10   | 2.11 | 2.10   | 0.02 | 0    | 1.23  | 2.07 | 2.15 | 21 |
|                    |                         | CIL-2017/13   | 1.89 | 1.89   | 0.03 | 0    | 1.73  | 1.81 | 1.95 | 21 |
|                    |                         | CCAP 1613/3   | 2.12 | 2.13   | 0.22 | 0.04 | 10.37 | 1.73 | 2.68 | 21 |
|                    |                         | CCAP 1613/4   | 1.61 | 1.62   | 0.07 | 0.01 | 4.77  | 1.43 | 1.73 | 21 |
|                    |                         | CCAP 1613/5   | 2.07 | 2.07   | 0.09 | 0.01 | 4.40  | 1.86 | 2.22 | 21 |
|                    |                         | CCAP 1613/6   | 2.09 | 2.08   | 0.04 | 0    | 2.10  | 1.98 | 2.17 | 21 |
|                    |                         | CCAP 1613/7   | 1.49 | 1.49   | 0.01 | 0    | 1.14  | 1.46 | 1.52 | 21 |
|                    |                         | CCAP 1613/8   | 1.64 | 1.63   | 0.05 | 0.01 | 3.37  | 1.55 | 1.73 | 21 |
|                    |                         | CCAP 1613/9   | 1.85 | 1.84   | 0.02 | 0    | 1.31  | 1.82 | 1.90 | 21 |
|                    |                         | CCAP 1613/10  | 1.82 | 1.83   | 0.03 | 0    | 2.02  | 1.77 | 1.88 | 21 |
|                    |                         | CCAP 1613/11  | 1.87 | 1.86   | 0.03 | 0    | 1.80  | 1.82 | 1.95 | 21 |
| CCAP 1613/12       | 1.79                    | 1.80          | 0.03 | 0      | 2.13 | 1.71 | 1.88  | 21   |      |    |
|                    | <i>Coleps hirtus</i>    | CCAP 1613/14  | 1.93 | 1.94   | 0.12 | 0.02 | 6.40  | 1.68 | 2.14 | 21 |
|                    | <i>Nolandia nolandi</i> | CCAP 1613/15  | 2.01 | 1.97   | 0.11 | 0.02 | 5.90  | 1.80 | 2.24 | 21 |

| Character                  | Species                  | Strain number | Number of plates | Number of windows | Anterior main plate<br>Number of windows<br>- (n) | Anterior secondary<br>plate - Number of<br>windows - (n) | Posterior main plate<br>- Number of<br>windows - (n) |
|----------------------------|--------------------------|---------------|------------------|-------------------|---------------------------------------------------|----------------------------------------------------------|------------------------------------------------------|
| General<br>characteristics | <i>Coleps viridis</i>    | CIL-2017/5    | 6                | 14-16             | 5 (21)                                            | 2 (21)                                                   | 5 (21)                                               |
|                            |                          | CIL-2017/6    | 6                | 14-16             | 5 (21)                                            | 2 (21)                                                   | 4 (21)                                               |
|                            |                          | CIL-2017/7    | 6                | 14-16             | 5 (18)<br>5-6 (3)                                 | 2 (21)                                                   | 4-5 (5)<br>5 (16)                                    |
|                            |                          | CIL-2017/8    | 6                | 14-16             | 5 (21)                                            | 2 (21)                                                   | 4-5 (1)<br>5 (20)                                    |
|                            |                          | CIL-2017/9    | 6                | 14-16             | 4 (21)                                            | 2 (21)                                                   | 4 (21)                                               |
|                            |                          | CIL-2017/10   | 6                | 14-16             | 4-5 (1)<br>5 (20)                                 | 2 (21)                                                   | 5 (21)                                               |
|                            |                          | CIL-2017/13   | 6                | 14-16             | 4-5 (5)<br>5 (15)<br>5-6 (1)                      | 2 (17)<br>2-3 (4)                                        | 4 (1)<br>4-5 (8)<br>5 (12)                           |
|                            |                          | CCAP 1613/3   | 6                | 12-13             | 4 (19)<br>4-5 (2)                                 | 2 (21)                                                   | 4 (21)                                               |
|                            |                          | CCAP 1613/4   | 6                | 12                | 4 (18)<br>4-5 (3)                                 | 2 (21)                                                   | 4 (21)                                               |
|                            |                          | CCAP 1613/5   | 6                | 12                | 4 (21)                                            | 2 (21)                                                   | 4 (21)                                               |
|                            |                          | CCAP 1613/6   | 6                | 12                | 4 (21)                                            | 2 (21)                                                   | 4 (21)                                               |
|                            |                          | CCAP 1613/7   | 6                | 14-16             | 4-5 (1)<br>5 (18)<br>5-6 (2)                      | 2 (21)                                                   | 4-5 (4)<br>5 (17)                                    |
|                            |                          | CCAP 1613/8   | 6                | 12-14             | 4 (3)<br>4-5 (16)<br>5 (2)                        | 2 (7)<br>2-3 (12)<br>3 (2)                               | 4 (2)<br>4-5 (15)<br>5 (4)                           |
|                            |                          | CCAP 1613/9   | 6                | 12                | 4 (21)                                            | 2 (21)                                                   | 4 (21)                                               |
|                            |                          | CCAP 1613/10  | 6                | 12-14             | 3-4 (1)<br>4 (20)                                 | 2 (21)                                                   | 4 (21)                                               |
|                            | CCAP 1613/11             | 6             | 14-16            | 4-5 (1)<br>5 (20) | 2 (21)                                            | 4 (3)<br>4-5 (10)<br>5 (8)                               |                                                      |
|                            | CCAP 1613/12             | 6             | 12-14            | 4 (21)            | 2 (21)                                            | 4 (21)                                                   |                                                      |
|                            | <i>Coleps hirtus</i>     | CCAP 1613/14  | 6                | 12-13             | 3-4-5 (1)<br>4 (17)<br>4-5 (2)<br>5 (1)           | 2 (21)                                                   | 4 (11)<br>4-5 (6)<br>5 (4)                           |
|                            | <i>Nolandia nolandii</i> | CCAP 1613/15  | 6                | 12-14             | 3-4 (1)<br>4 (2)<br>4-5 (16)<br>5 (1)<br>5-6 (1)  | 2 (21)                                                   | 4 (3)<br>4-5 (12)<br>5 (3)<br>6 (2)                  |

| Character               | Species                  | Strain number        | Posterior secondary plate - Number of windows - (n) | Number of caudal cilia | Number of anterior spines - (n) | Number of posterior spines - (n)          | Window type                      |
|-------------------------|--------------------------|----------------------|-----------------------------------------------------|------------------------|---------------------------------|-------------------------------------------|----------------------------------|
| General characteristics | <i>Coleps viridis</i>    | CIL-2017/5           | 2 (21)                                              | 1 (21)                 | 0 (7)<br>1 (14)                 | 3 (4)<br>4(17)                            | <i>hirtus</i> -type              |
|                         |                          | CIL-2017/6           | 2 (21)                                              | 1 (21)                 | 0 (7)<br>1 (14)                 | 3 (5)<br>4(16)                            | <i>hirtus</i> -type              |
|                         |                          | CIL-2017/7           | 2 (21)                                              | 1 (21)                 | 0 (8)<br>1 (13)                 | 3 (4)<br>4(17)                            | <i>hirtus</i> -type              |
|                         |                          | CIL-2017/8           | 2 (21)                                              | 1 (21)                 | 1 (21)                          | 2 (2)<br>3 (3)<br>4 (12)<br>5 (1)         | <i>hirtus</i> -type              |
|                         |                          | CIL-2017/9           | 2 (21)                                              | 1 (21)                 | 0 (1)<br>1 (20)                 | 3 (6)<br>4(15)                            | <i>hirtus</i> -type              |
|                         |                          | CIL-2017/10          | 2 (21)                                              | 1 (21)                 | 0 (4)<br>1 (16)<br>2 (1)        | 3 (2)<br>4(19)                            | <i>hirtus</i> -type              |
|                         |                          | CIL-2017/13          | 2 (21)                                              | 1 (21)                 | 0 (13)<br>1 (7)<br>2 (1)        | 0 (1)<br>1 (1)<br>2 (4)<br>3 (6)<br>4 (9) | <i>hirtus</i> -type              |
|                         |                          | CCAP 1613/3          | 2 (21)                                              | 1 (21)                 | 0 (21)                          | 0 (21)                                    | <i>hirtus</i> -type              |
|                         |                          | CCAP 1613/4          | 2 (21)                                              | 1 (21)                 | 0 (21)                          | 0 (20)<br>1 (1)                           | <i>hirtus</i> -type              |
|                         |                          | CCAP 1613/5          | 2 (21)                                              | 1 (21)                 | 0 (21)                          | 1 (5)<br>2 (6)<br>3 (6)<br>4 (4)          | <i>hirtus</i> -type              |
|                         |                          | CCAP 1613/6          | 2 (21)                                              | 1 (21)                 | 1 (21)                          | 2 (1)<br>3 (13)<br>4 (7)                  | <i>hirtus</i> -type              |
|                         |                          | CCAP 1613/7          | 2 (20)<br>3 (1)                                     | 1 (21)                 | 0 (8)<br>1 (13)                 | 1 (2)<br>2 (5)<br>3 (5)<br>4 (9)          | <i>hirtus</i> -type              |
|                         |                          | CCAP 1613/8          | 2 (20)<br>2-3 (1)                                   | 1 (21)                 | 0 (2)<br>1 (18)<br>2 (1)        | 2 (7)<br>3 (13)<br>5 (1)                  | <i>hirtus</i> -type              |
|                         |                          | CCAP 1613/9          | 2 (21)                                              | 1 (21)                 | 0 (13)<br>1 (8)                 | 0 (1)<br>1 (2)<br>2 (8)<br>3 (10)         | <i>hirtus</i> -type              |
|                         |                          | CCAP 1613/10         | 2 (21)                                              | 1 (21)                 | 0 (20)<br>1 (1)                 | 0 (8)<br>1 (9)<br>2 (4)                   | <i>hirtus</i> -type              |
|                         |                          | CCAP 1613/11         | 2 (21)                                              | 1 (21)                 | 0 (19)<br>1 (2)                 | 2 (3)<br>3 (9)<br>4 (9)                   | <i>hirtus</i> -type              |
|                         |                          | CCAP 1613/12         | 2 (21)                                              | 1 (21)                 | 0 (18)<br>1 (3)                 | 1 (2)<br>2 (7)<br>3 (7)<br>4 (5)          | <i>hirtus</i> -type              |
|                         |                          | <i>Coleps hirtus</i> | CCAP 1613/14                                        | 2 (21)                 | 1 (21)                          | 0 (21)                                    | 1 (5)<br>2 (6)<br>3 (6)<br>4 (4) |
|                         | <i>Nolandia nolandii</i> | CCAP 1613/15         | 2 (15)<br>2-3 (1)<br>3 (5)                          | 1 (21)                 | 0 (21)                          | 0 (1)<br>1 (6)<br>2 (10)<br>3 (4)         | <i>nolandii</i> -type            |

| Character               | Species                 | Strain number | Shape of ridge | Body shape    | Presence of green algal endosymbionts - (n) |
|-------------------------|-------------------------|---------------|----------------|---------------|---------------------------------------------|
| General characteristics | <i>Coleps viridis</i>   | CIL-2017/5    | Wing-like      | Barrel-shaped | Yes (21)                                    |
|                         |                         | CIL-2017/6    | Wing-like      | Barrel-shaped | Yes (18)<br>No (3)                          |
|                         |                         | CIL-2017/7    | Wing-like      | Barrel-shaped | Yes (21)                                    |
|                         |                         | CIL-2017/8    | Wing-like      | Barrel-shaped | Yes (16)<br>No (5)                          |
|                         |                         | CIL-2017/9    | Wing-like      | Barrel-shaped | No (21)                                     |
|                         |                         | CIL-2017/10   | Wing-like      | Barrel-shaped | Yes (4)<br>No (17)                          |
|                         |                         | CIL-2017/13   | Wing-like      | Barrel-shaped | Yes (21)                                    |
|                         |                         | CCAP 1613/3   | Not wing-like  | Barrel-shaped | No (21)                                     |
|                         |                         | CCAP 1613/4   | Not wing-like  | Barrel-shaped | Yes (21)                                    |
|                         |                         | CCAP 1613/5   | Not wing-like  | Barrel-shaped | Yes (11)<br>No (10)                         |
|                         |                         | CCAP 1613/6   | Wing-like      | Barrel-shaped | No (21)                                     |
|                         |                         | CCAP 1613/7   | Wing-like      | Barrel-shaped | Yes (21)                                    |
|                         |                         | CCAP 1613/8   | Wing-like      | Barrel-shaped | No (21)                                     |
|                         |                         | CCAP 1613/9   | Wing-like      | Barrel-shaped | No (21)                                     |
|                         |                         | CCAP 1613/10  | Wing-like      | Barrel-shaped | No (21)                                     |
|                         |                         | CCAP 1613/11  | Wing-like      | Pyriform      | Yes (21)                                    |
|                         |                         | CCAP 1613/12  | Wing-like      | Barrel-shaped | No (21)                                     |
|                         | <i>Coleps hirtus</i>    | CCAP 1613/14  | Not wing-like  | Barrel-shaped | No (21)                                     |
|                         | <i>Nolandia nolandi</i> | CCAP 1613/15  | Wing-like      | Cylindrical   | No (21)                                     |



**Table S3:** List of GenBank entries found with the BLASTn search algorithm (100% coverage, >97% identity) using the V4 region (SSU) and the respective haplotype. Accession numbers marked in green are the strains investigated in this study.

| Accession # | Haplotype | Origin            | Habitat    | Reference               |
|-------------|-----------|-------------------|------------|-------------------------|
| MT253670    | 1a        | UK                | freshwater | this study              |
| MT253671    | 1a        | UK                | freshwater | this study              |
| MT253672    | 1a        | UK                | freshwater | this study              |
| MT253673    | 1a        | Switzerland       | freshwater | this study              |
| MT253674    | 1a        | Austria           | freshwater | this study              |
| MT253675    | 1a        | Austria           | freshwater | this study              |
| MT253676    | 1a        | Austria           | freshwater | this study              |
| MT253677    | 1a        | Austria           | freshwater | this study              |
| MT253678    | 1a        | Austria           | freshwater | this study              |
| MT253679    | 1a        | Austria           | freshwater | this study              |
| MT253680    | 1a        | Austria           | freshwater | this study              |
| MT253681    | 1a        | Austria           | freshwater | this study              |
| MT253682    | 1a        | Switzerland       | freshwater | this study              |
| MT253683    | 1a        | Austria           | freshwater | this study              |
| MT253684    | 1a        | Germany           | freshwater | this study              |
| MT253686    | 1a        | Switzerland       | freshwater | this study              |
| AM292312    | 1a        | Germany           | freshwater | Barth et al. (2008)     |
| LS999899    | 1a        | Switzerland       | freshwater | Pitsch et al. (2019)    |
| JN090894    | 1a        | Greece            | freshwater | Oikonomou et al. (2012) |
| EU446361    | 1a        | Mediterranean Sea | marine     | Alexander et al. (2009) |
| EU024974    | 1a        | Austria           | freshwater | Auinger et al. (2008)   |
| FJ765380    | 1a        | South Korea       | freshwater | Joo et al. (2010)       |
| LN870142    | 1b        | Italy             | freshwater | Rossi et al. (2016)     |
| LN870060    | 1b        | Italy             | freshwater | Rossi et al. (2016)     |
| LN869945    | 1b        | Italy             | freshwater | Rossi et al. (2016)     |
| LN870149    | 1b        | Italy             | freshwater | Rossi et al. (2016)     |
| LN870054    | 1b        | Italy             | freshwater | Rossi et al. (2016)     |
| EU446396    | 1c        | Mediterranean Sea | marine     | Alexander et al. (2009) |
| U97109      | 1d        | unknown           | unknown    | unpublished             |
| MT253685    | 1e        | Austria           | freshwater | this study              |
| MT253687    | 2a        | Austria           | freshwater | this study              |
| LN870048    | 2a        | Italy             | freshwater | Rossi et al. (2016)     |
| LN870110    | 2a        | Italy             | freshwater | Rossi et al. (2016)     |
| LN870063    | 2a        | Italy             | freshwater | Rossi et al. (2016)     |
| LN870036    | 2a        | Italy             | freshwater | Rossi et al. (2016)     |
| LN870025    | 2a        | Italy             | freshwater | Rossi et al. (2016)     |
| LN870011    | 2a        | Italy             | freshwater | Rossi et al. (2016)     |
| AM292311    | 2a        | Germany           | freshwater | Barth et al. (2008)     |
| DQ487194    | 2a        | USA               | freshwater | Duff et al. (2008)      |
| HM140399    | 2b        | South Korea       | freshwater | unpublished             |
| LN870155    | 2c        | Italy             | freshwater | Rossi et al. (2016)     |
| KF639909    | 2c        | USA               | freshwater | Dunthorn et al. (2014)  |
| X76646      | 2d        | USA               | freshwater | Stechmann et al. (1998) |

**References:**

- Alexander, E., Stock, A., Breiner, H.-W., Behnke, A., Bunge, J., Yakimov, M. M. & Stoeck, T. Microbial eukaryotes in the hypersaline anoxic L'Atalante deep-sea basin. *Environ. Microbiol.* **11**, 360-381 (2009).
- Auinger, B. M., Pfandl, K., Boenigk, J. Improved methodology for identification of protists and microalgae from plankton samples preserved in Lugol's iodine solution: combining microscopic analysis with single-cell PCR. *Appl. Environ. Microbiol.* **74**, 2505-2510 (2008).
- Barth, D., Tischer, K., Berger, H., Schlegel, M. & Berendonk, T. High mitochondrial haplotype diversity of *Coleps* sp. (Ciliophora: Prostomatida). *Environ. Microbiol.* **10**, 626-634 (2008).
- Duff, R.J., Ball, H., Lavrentyev, P. J. Application of combined morphological-molecular approaches to the identification of planktonic protists from environmental samples. *J. Eukaryot. Microbiol.* **55**, 306-312 (2008).
- Dunthorn, M., Hall, M., Foissner, W., Stoeck, T., Katz, L. A. Broad taxon sampling of ciliates using mitochondrial small subunit ribosomal DNA. *Acta Protozool.* **53**, 207-213 (2014).
- Joo, S., Lee, S.R., Park, S. Monitoring of phytoplankton community structure using terminal restriction fragment length polymorphism (T-RFLP). *J. Microbiol. Methods* **81**, 61-68 (2010).
- Oikonomou, A., Katsiapi, M., Karayanni, H., Moustaka-Gouni, M., Kormas, K. A. Plankton microorganisms coinciding with two consecutive mass fish kills in a newly reconstructed lake. *Sci. World J.* **2012**, 504135 (2012).
- Pitsch, G., Bruni, E. P., Forster, D., Qu, Z., Sonntag, B., Stoeck T. & Posch, T. Seasonality of planktonic freshwater ciliates: are analyses based on V9 regions of the 18S rRNA gene correlated with morphospecies counts? *Front. Microbiol.* **10**, 248 (2019).
- Rossi, A., Boscaro, V., Carducci, D., Serra, V., Modeo, L., Verni, F., Fokin, S. I., Petroni, G. Ciliate communities and hidden biodiversity in freshwater biotopes of the Pistoia province (Tuscany, Italy). *Eur. J. Protist.* **53**, 11-19 (2016).
- Stechmann, A., Schlegel, M., Lynn, D. H. Phylogenetic relationships between prostome and colpodean ciliates tested by small subunit rRNA sequences. *Mol. Phylogenet. Evol.* **9**, 48-54 (1998).

**Table S4:** Geography and hydrological parameters of both lakes (Lake Mondsee, Austria and Lake Zurich, Switzerland).

| <b>Lake</b>                          | <b>Mondsee (LM)</b> | <b>Zurich (LZ)</b>  |
|--------------------------------------|---------------------|---------------------|
| <b>Country</b>                       | Austria             | Switzerland         |
| <b>Coordinates sampling site</b>     | 47°50'N, 13°23'E    | 47°19.3'N, 8°33.9'E |
| <b>Elevation (m a.s.l.)</b>          | 481                 | 406                 |
| <b>Surface area (km<sup>2</sup>)</b> | 14.2                | 66.2                |
| <b>Average depth (m)</b>             | 36                  | 50                  |
| <b>Maximum depth (m)</b>             | 68                  | 136                 |
